# Supplementary material
Source: ML conference proceedings conference paper supplement (https://openreview.net/forum?id=0XIsA0PxJM)

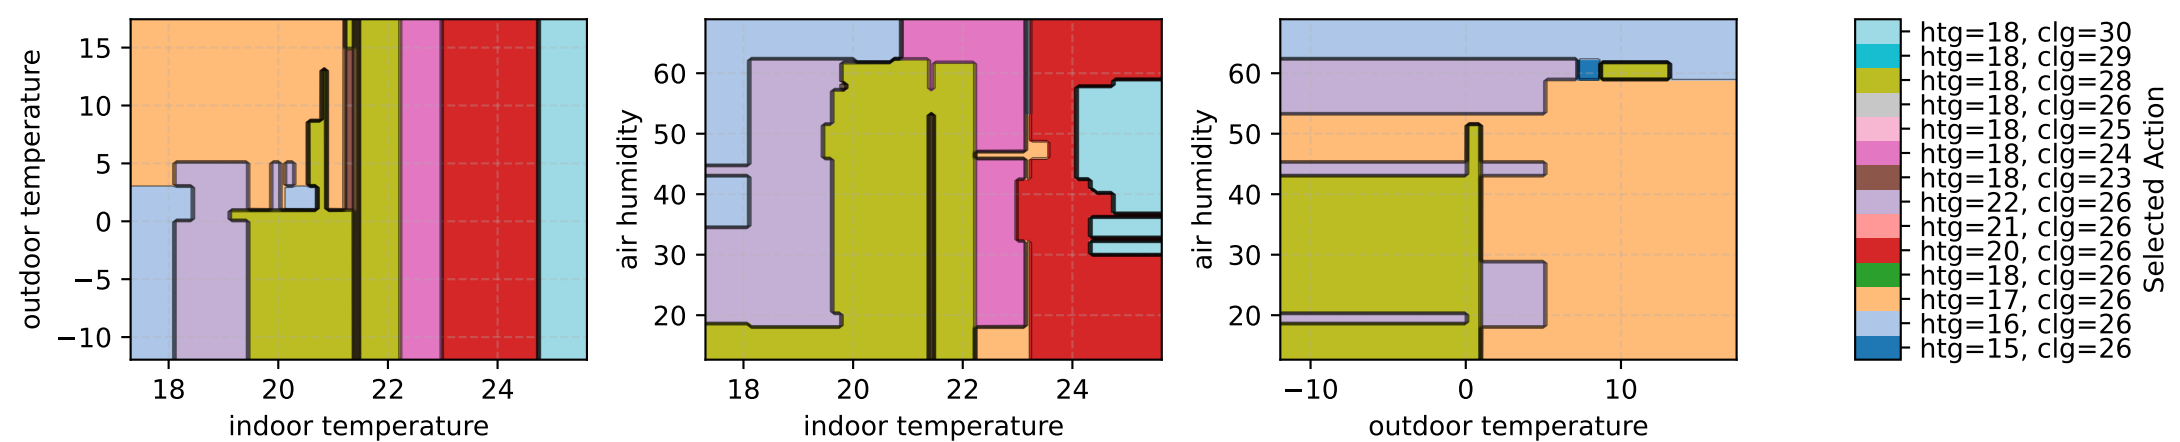

Supplement: supplementary_material [file Sinergym_action_heatmap_grid1x3.pdf › Sinergym_action_heatmap_grid1x3.pdf]

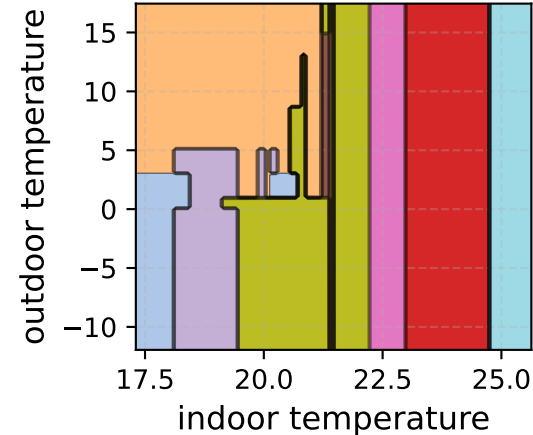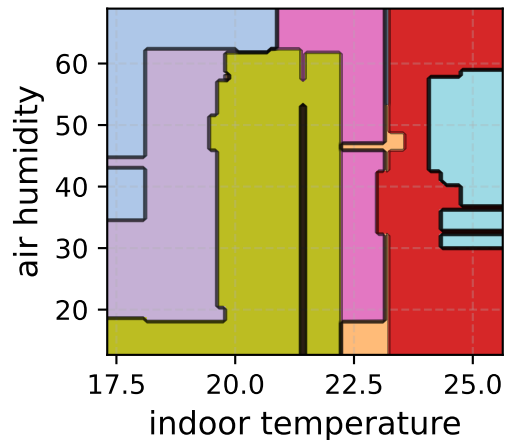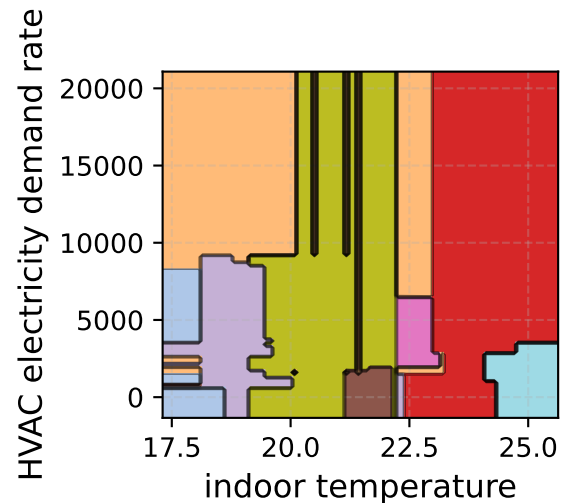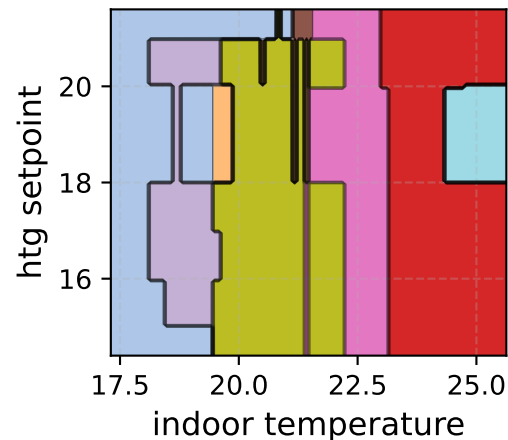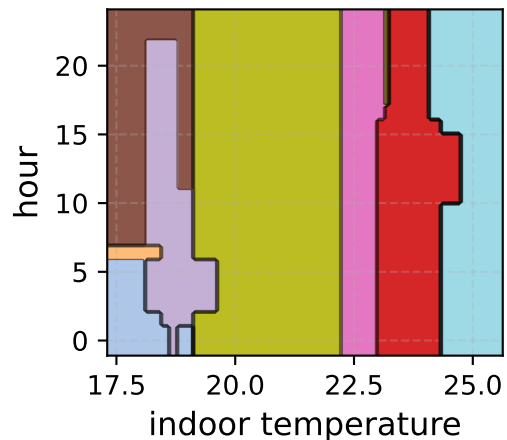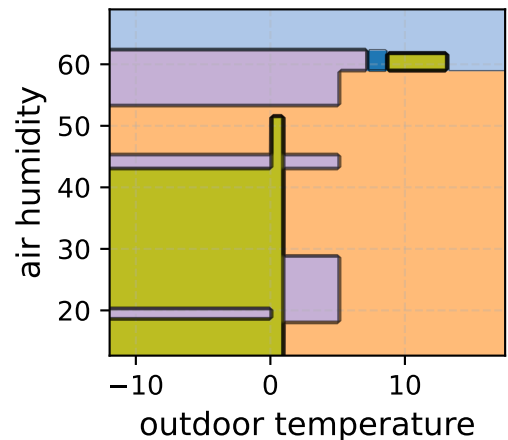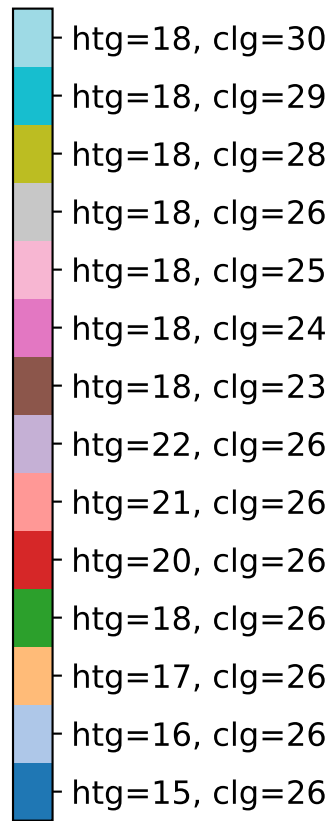

Supplement: supplementary_material [file Sinergym_action_heatmap_grid2x3.pdf › Sinergym_action_heatmap_grid2x3.pdf]

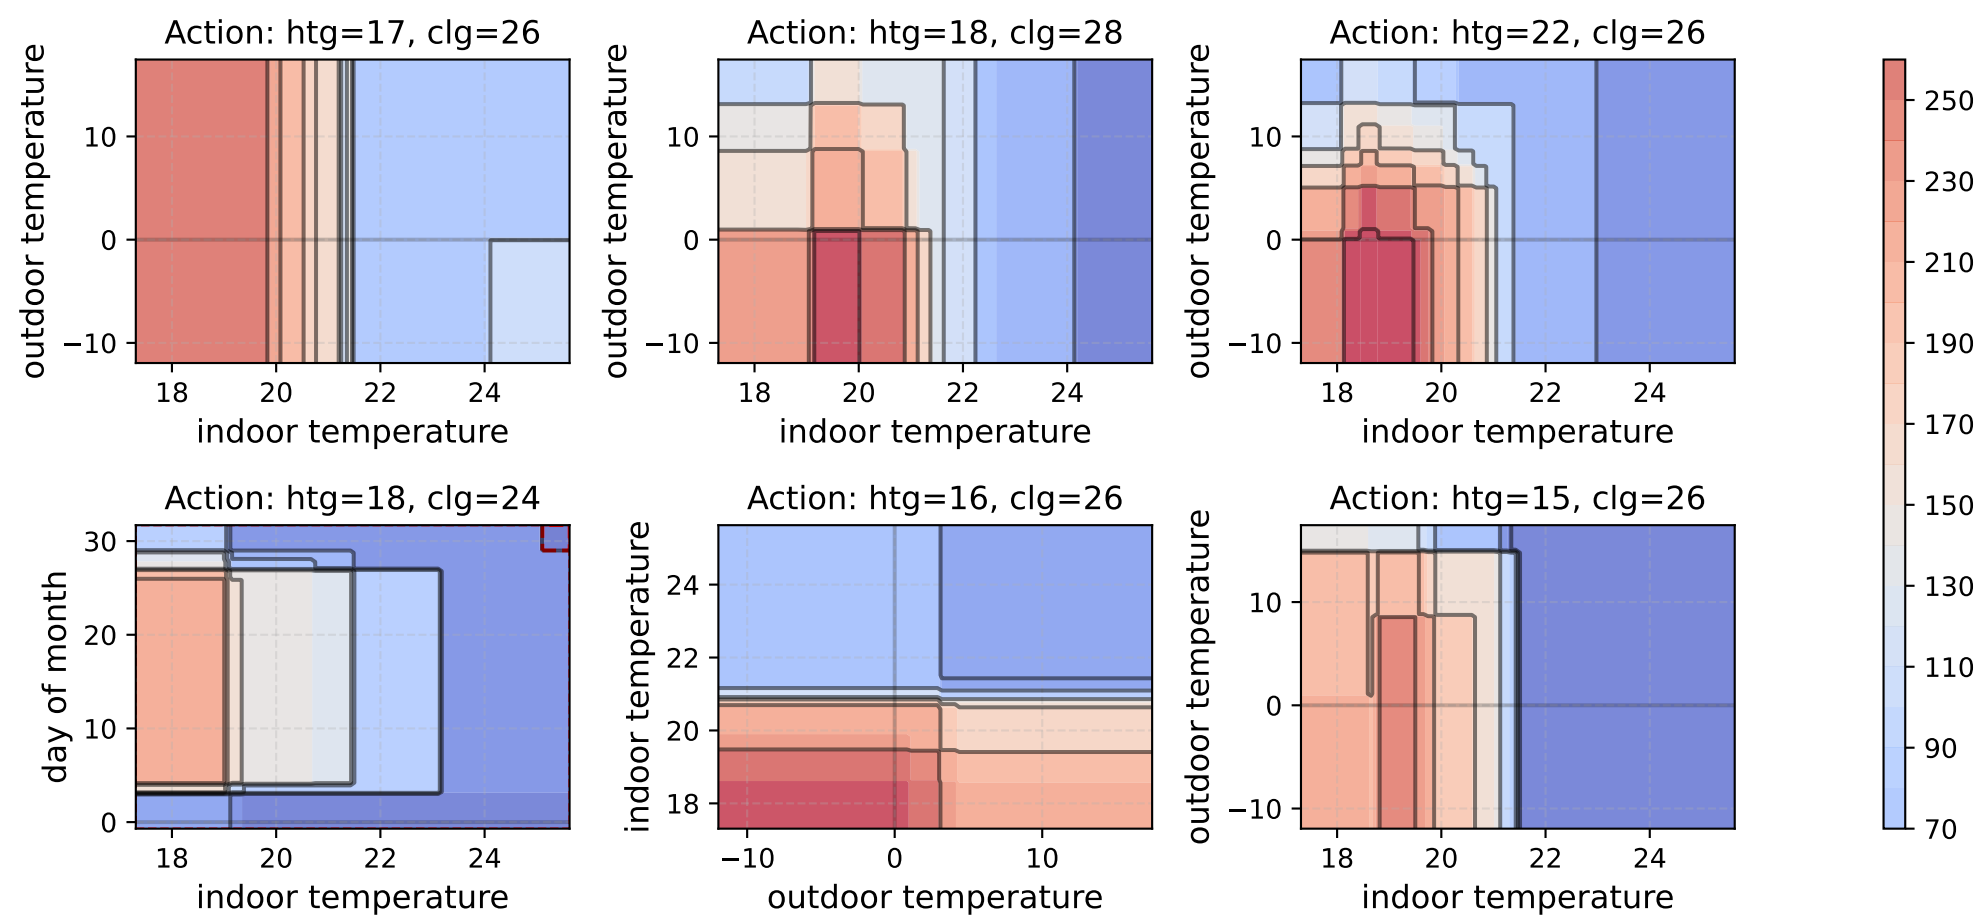

Supplement: supplementary_material [file Sinergym_rule_contour_unified.pdf › Sinergym_rule_contour_unified.pdf]
